# Supplementary material for: Gut germinal center regeneration and enhanced antiviral immunity by mesenchymal stem/stromal cells in SIV infection
Source: PubMed Central journal article supplement (PMC8262475; doi:10.1172/jci.insight.149033), 2021-06-22
Supplement: jciinsight-6-149033-s047.pdf [file jciinsight-6-149033-s047.pdf]

## SUPPLEMENTARY MATERIALS

**A**

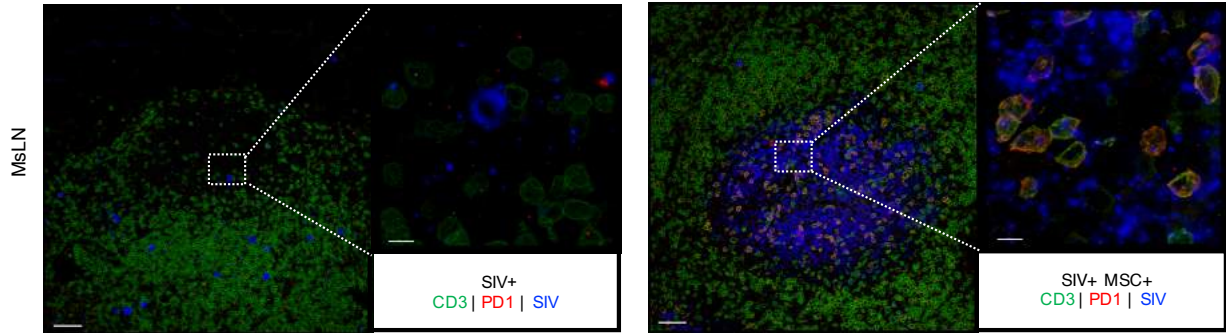

**B**

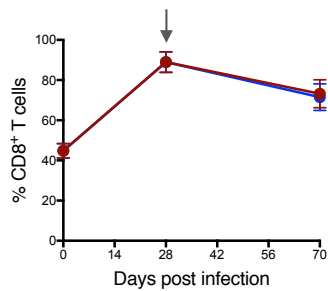

**Supplementary Figure 1. Detection of viral loads in the periphery and localization in the tissue. (A)** Dual in situ RNA hybridization and immunohistochemistry analysis of GC of the MsLN of SIV+MSC+ and SIV+, respectively, showing viral RNA (blue), T cells (green) and PD-1 (red). Magnification 20x and 100x. Scale bars 20 $\mu$ m and 50 $\mu$ m. **(B)** Longitudinal percentage of CD4<sup>+</sup> T cells in the gut (SIV+ n = 7 and SIV+MSC+ n = 5). Data represent the mean ( $\pm$  SEM) for each time point. Grey arrow represents the first MSC administration.

**A** DOWN: SIV+ vs. SIV-

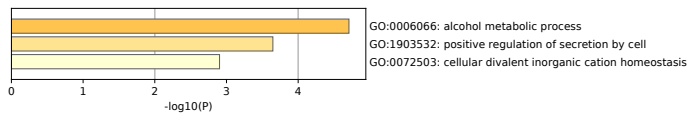

**B** DOWN: SIV+MSC+ vs. SIV-

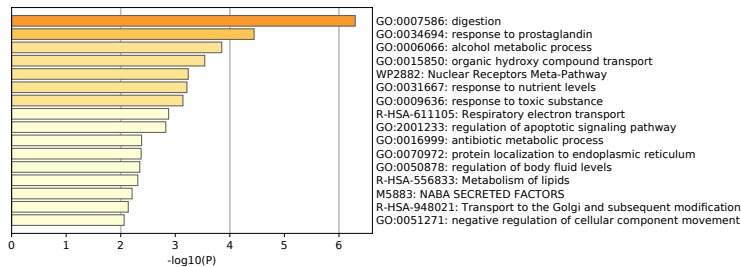

**C** SIV+ vs. SIV-

Gene Count/ Enriched Pathway Key

- 16 ■ Defense response to virus
- 5 ■ Type II interferon signaling (IFNG)
- 9 ■ Response to bacterium
- 3 ■ Response to interferon-alpha
- 4 ■ Regulation of defense response to virus
- 6 ■ Negative regulation of hydrolase activity
- 3 ■ Non-genomic actions of 1,25 dihydroxy vitamin D3
- 4 ■ Positive regulation of transmembrane transport
- 4 ■ Establishment of vesicle localization
- 4 ■ Regionalization
- 3 ■ Viral carcinogenesis
- 3 ■ Extrinsic apoptotic signaling pathway
- 4 ■ Regulation of inflammatory response

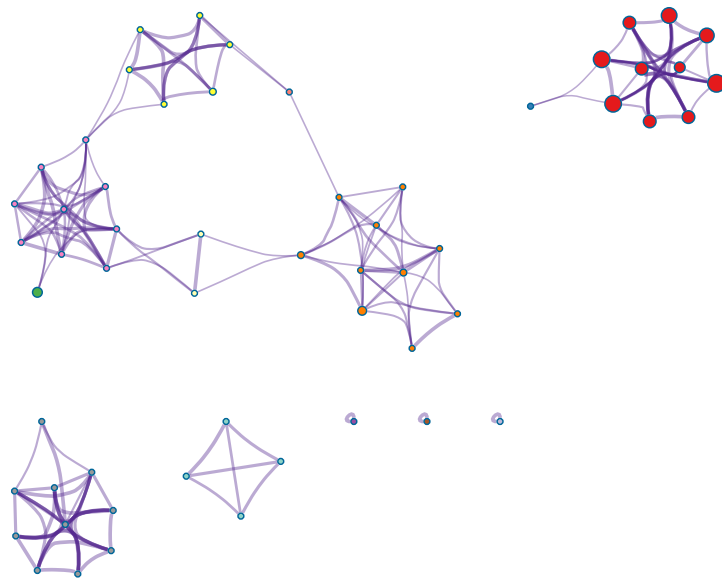

**D** SIV+ vs. SIV-

| MCODE | Pathway/Description                            | Log10(P) |
|-------|------------------------------------------------|----------|
| 1     | IFN- $\alpha/\beta$ signaling                  | -26.3    |
|       | Type-1 IFN signaling                           | -24.9    |
|       | Cellular response to type-1 IFN                | -24.9    |
| 2     | ISG15 antiviral mechanism                      | -10.4    |
|       | Antiviral mechanism by IFN-stimulated genes    | -10.2    |
| 3     | IFN signaling                                  | -8.6     |
|       | Allograft rejection                            | -7.5     |
|       | Peptide-ligand binding receptors               | -6.4     |
|       | Positive regulation of transmembrane transport | -6.4     |

**E**

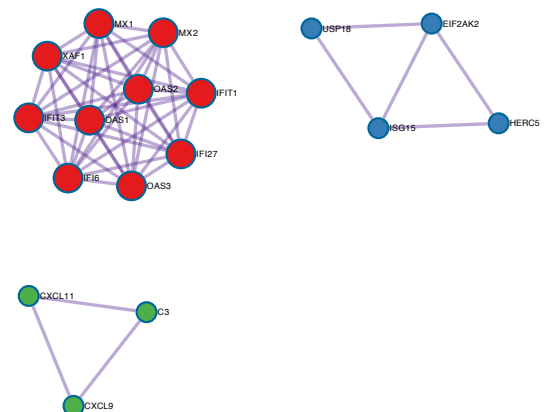

**Supplementary Figure 2. Gut mucosal gene expression signature associated with MSC-treated SIV infected macaques. (A and B) Bar graphs show enriched down-regulated biological**

pathways detected where P represents the Benjamini-Hochberg FDR. **(C)** Network analysis showing term enrichment (node size based on gene count) and interactions (edges) between the top 20 detected biological pathways (color). **(D)** Table displays enriched MCODE modules as determined by a protein-protein interaction analysis. **(E)** Expressed proteins with known physical interactions, associations and biological regulation from enriched modules. All analyses and figures were generated through Metascape.org. Significant down-regulated DEGs from SIV+MSC+ vs. SIV- and SIV+ vs. SIV- animals were used as input to evaluate the magnitude of mucosal antiviral immunity following MSC administration.

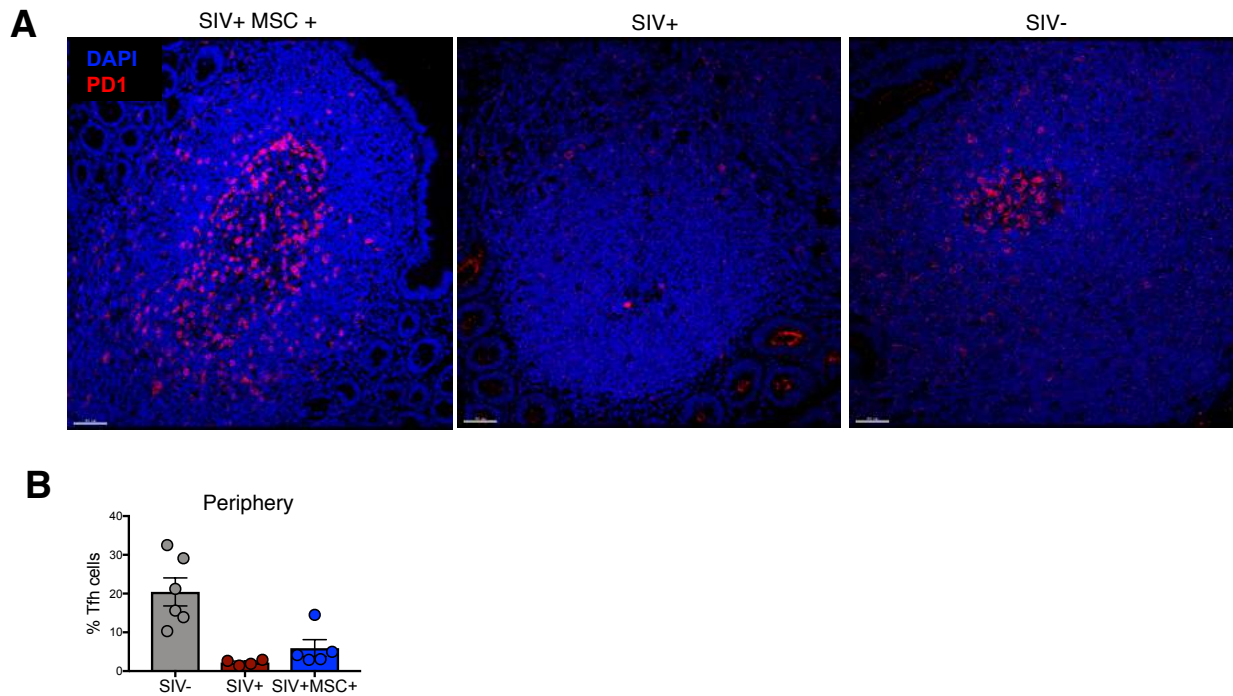

**Supplementary Figure 3. Detection of PD-1+ T expression in gut lymphoid follicles (A)**

Immunohistochemical analysis of PD-1+ expressing cells within ileal lymphoid follicles from representative SIV-, SIV+ and SIV+MSC+ macaques at 70 dpi. Gut sections show nuclei (blue), and anti-PD-1 (red) in the lymphoid follicle. Magnification 20x. Scale bars 50 $\mu$ m. **(B)** Percentage of Tfh (CD4+ CXCR5+) determined by flow cytometry in the peripheral blood (SIV-=6, SIV+n=4, SIV+MSC+n=5).

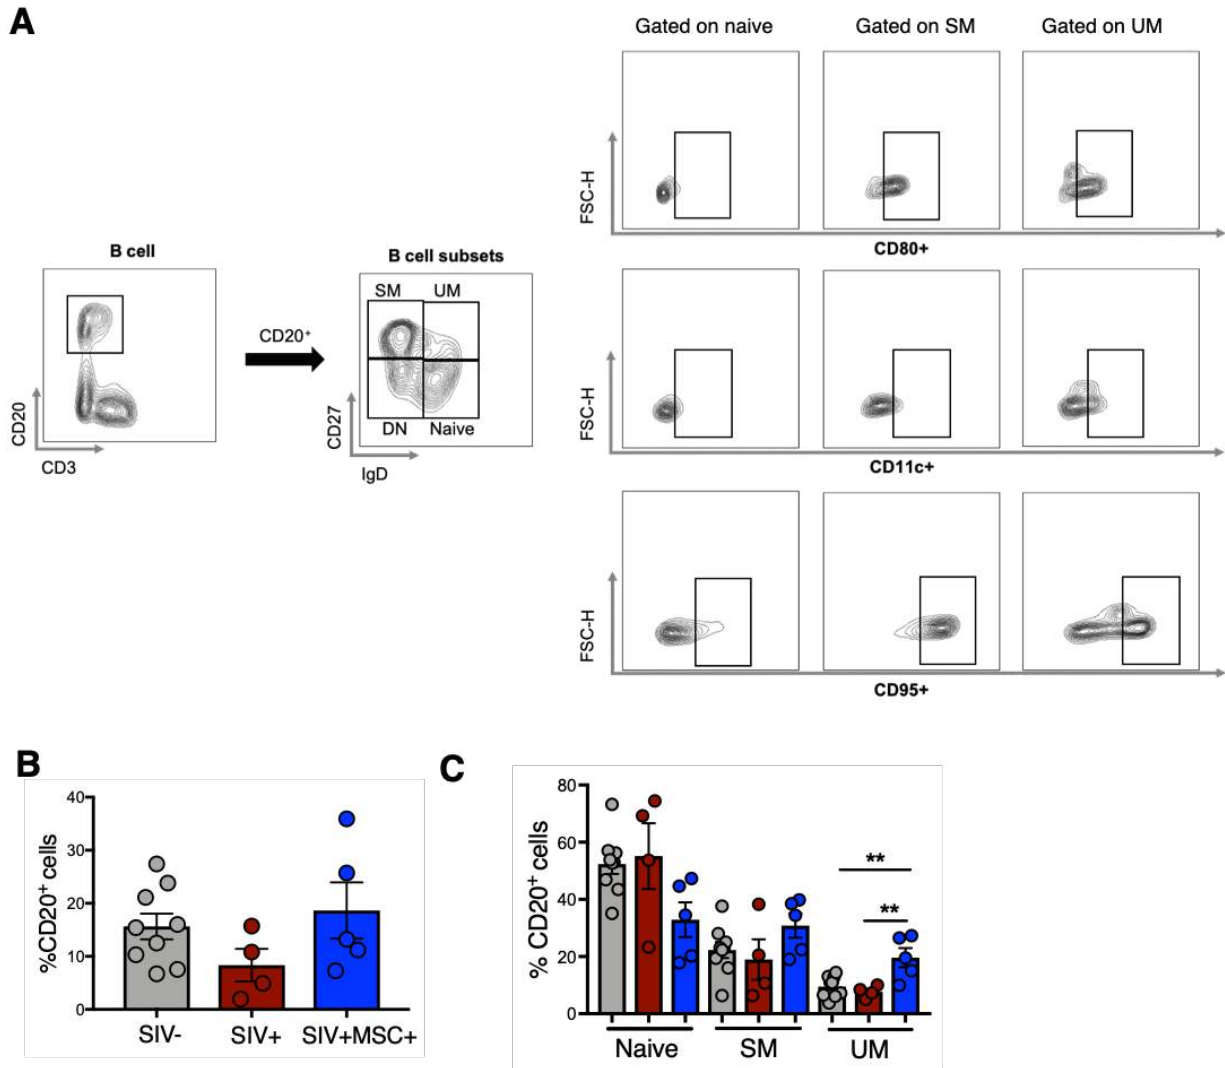

**Supplementary Figure 4. Flow cytometric gating strategy and B cell subsets in peripheral blood.** (A) Shown are percentages of B cells after gating on lymphocytes, singlets and live cells. B cells were identified by gating on CD3- CD20+ cells. Naïve (CD27- IgD+), switched memory (SM, CD27+ IgD-) and unswitched memory (UM, CD27+ IgD+) were identified by gating on CD27 and IgG. Cells were then gated on CD80, CD11c and CD95. (B and C) Frequency of total B cell (CD3- CD20+), naïve, switched and unswitched B cell populations (SIV-, n=9; SIV+, n =

4; SIV+MSC+, n = 5) at 70 dpi. Significance was determined using the 1-way ANOVA with Holm-Sidak post hoc testing for multiple comparisons (C). \*\* ( $P \leq 0.01$ ).

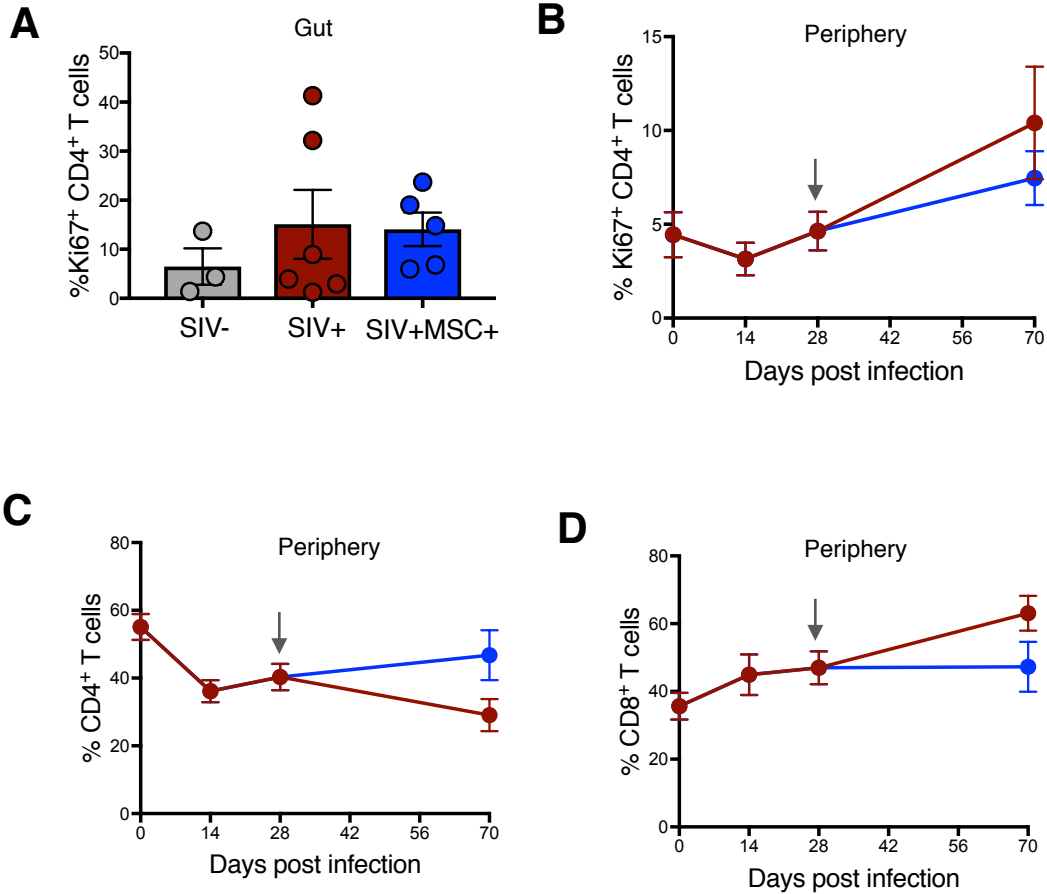

**Supplementary Figure 5. Detection of T cells subsets.** (A) Percentage of Ki67+ CD4+ T cells at 70 dpi in the colon (SIV- n=3, SIV+ n = 6, SIV+MSC+ n=5). (B-D) Longitudinal frequencies of Ki67+ CD4+ T cells, CD4+ T cells and CD8+ T cells in the periphery at 0, 14, 28 and 70 dpi gut (SIV+ n = 7 and SIV+MSC+ n = 5). Data represent the mean ( $\pm$  SEM) for each time point. Grey arrow represents the first MSC administration.

| BIOCHEMICAL                                          | log2fc SIV+/SIV- | p.value     | q.value     |
|------------------------------------------------------|------------------|-------------|-------------|
| equol sulfate                                        | -5.217732482     | 0.002625418 | 0.141441655 |
| lithocholate                                         | -2.932070097     | 0.047654433 | 0.173975112 |
| glutarate (C5-DC)                                    | -2.706905966     | 0.048814512 | 0.173975112 |
| heneicosapentaenoate (21:5n3)                        | -2.620059518     | 0.005975086 | 0.141441655 |
| dodecanedioate (C12)                                 | -2.617733563     | 0.012821685 | 0.141441655 |
| N-acetyltryptophan                                   | -2.23424581      | 0.020106576 | 0.163434898 |
| cinnamoylglycine                                     | -2.17719144      | 0.008159341 | 0.141441655 |
| N-octanoylglycine                                    | -2.073713503     | 0.017445605 | 0.16249916  |
| docosahexaenoate (DHA; 22:6n3)                       | -2.008335692     | 0.011068407 | 0.141441655 |
| 10-undecenoate (11:1n1)                              | -1.951916855     | 0.00263701  | 0.141441655 |
| valylglycine                                         | -1.948219691     | 0.041745771 | 0.173928856 |
| indoleacetylglutamine                                | -1.788619659     | 0.047937309 | 0.173975112 |
| 3-hydroxydecanoate                                   | -1.739257929     | 0.043170587 | 0.173928856 |
| eicosapentaenoate (EPA; 20:5n3)                      | -1.719526249     | 0.007003571 | 0.141441655 |
| cis-4-decenoate (10:1n6)*                            | -1.712098214     | 0.010265927 | 0.141441655 |
| 2'-deoxyuridine                                      | -1.693470996     | 0.006429544 | 0.141441655 |
| docosapentaenoate (n6 DPA; 22:5n6)                   | -1.662201533     | 0.008180663 | 0.141441655 |
| 3-hydroxyoctanoate                                   | -1.618034476     | 0.040539678 | 0.173928856 |
| N-acetylaspartate (NAA)                              | -1.563719889     | 0.048814512 | 0.173975112 |
| 4-oxo-retinoic acid                                  | -1.559311601     | 0.004841805 | 0.141441655 |
| linolenate (18:3n3 or 3n6)                           | -1.550540301     | 0.012821685 | 0.141441655 |
| 3-bromo-5-chloro-2,6-dihydroxybenzoic acid*          | -1.533123721     | 0.007016199 | 0.141441655 |
| stearidonate (18:4n3)                                | -1.500334508     | 0.010979131 | 0.141441655 |
| retinal                                              | -1.500116264     | 0.019627115 | 0.16249916  |
| 3-hydroxymyristate                                   | -1.494956865     | 0.033524    | 0.169683493 |
| 5-dodecenoate (12:1n7)                               | -1.490028363     | 0.025784235 | 0.16825866  |
| arachidonate (20:4n6)                                | -1.474986858     | 0.007016199 | 0.141441655 |
| dihomolinoleate (20:2n6)                             | -1.464341579     | 0.012821685 | 0.141441655 |
| (16 or 17)-methylstearate (a19:0 or i19:0)           | -1.448326748     | 0.017869873 | 0.16249916  |
| lactobacillic acid                                   | -1.426189881     | 0.012781783 | 0.141441655 |
| 3-hydroxystearate                                    | -1.4040713       | 0.01683404  | 0.16249916  |
| hexanoylglycine (C6)                                 | -1.381922053     | 0.022471077 | 0.16825866  |
| dihomolinolenate (20:3n3 or 3n6)                     | -1.343496804     | 0.012821685 | 0.141441655 |
| myristoylcarnitine (C14)                             | -1.332193676     | 0.048814512 | 0.173975112 |
| caprate (10:0)                                       | -1.316021764     | 0.022501067 | 0.16825866  |
| 1-myristoyl-2-arachidonoyl-GPC (14:0/20:4)*          | -1.295012842     | 0.008187777 | 0.141441655 |
| 1-linoleoyl-GPI* (18:2)*                             | -1.258525751     | 0.01964073  | 0.16249916  |
| indoleacetate                                        | -1.25568594      | 0.025784235 | 0.16825866  |
| margarate (17:0)                                     | -1.234022619     | 0.022531072 | 0.16825866  |
| 10-heptadecenoate (17:1n7)                           | -1.227315939     | 0.038088284 | 0.169683493 |
| trans-2-hexenoylglycine                              | -1.215501918     | 0.023952962 | 0.16825866  |
| 2-palmitoyl-GPC* (16:0)*                             | -1.212316702     | 0.01964073  | 0.16249916  |
| 1-stearoyl-GPI (18:0)                                | -1.205428585     | 0.019586293 | 0.16249916  |
| 3,5-dichloro-2,6-dihydroxybenzoic acid               | -1.175510371     | 0.025784235 | 0.16825866  |
| 1-linolenoyl-GPC (18:3)*                             | -1.169232287     | 0.033524    | 0.169683493 |
| 2-hydroxypalmitate                                   | -1.156585948     | 0.011068407 | 0.141441655 |
| 3beta-hydroxy-5-cholestenoate                        | -1.150787074     | 0.038002593 | 0.169683493 |
| stearate (18:0)                                      | -1.146188899     | 0.011068407 | 0.141441655 |
| undecenoylcarnitine (C11:1)                          | -1.140726018     | 0.038002593 | 0.169683493 |
| 2-hydroxynervonate*                                  | -1.131843318     | 0.047937309 | 0.173975112 |
| 2-hydroxybehenate                                    | -1.103638724     | 0.023561682 | 0.16825866  |
| myristate (14:0)                                     | -1.081039113     | 0.038088284 | 0.169683493 |
| dodecadienoate (12:2)*                               | -1.069933394     | 0.033524    | 0.169683493 |
| linoleate (18:2n6)                                   | -1.069218441     | 0.029435937 | 0.169683493 |
| octadecanedioate (C18)                               | -1.061882165     | 0.038088284 | 0.169683493 |
| 3-(3-hydroxyphenyl)propionate                        | -1.056419535     | 0.025718328 | 0.16825866  |
| sphingomyelin (d17:1/14:0, d16:1/15:0)*              | -1.033577356     | 0.029435937 | 0.169683493 |
| 1-palmitoleoyl-GPC* (16:1)*                          | -1.023341089     | 0.033524    | 0.169683493 |
| oleate/vaccenate (18:1)                              | -1.023001894     | 0.025784235 | 0.16825866  |
| 2-hydroxystearate                                    | -1.017932413     | 0.00368678  | 0.141441655 |
| 3-carboxy-4-methyl-5-propyl-2-furanpropanoate (CMPF) | -1.015852984     | 0.014816378 | 0.159644922 |
| docosadienoate (22:2n6)                              | -1.01133176      | 0.033445231 | 0.169683493 |
| adrenate (22:4n6)                                    | -1.00847747      | 0.027540699 | 0.169683493 |
| (14 or 15)-methylpalmitate (a17:0 or i17:0)          | -1.007676789     | 0.038088284 | 0.169683493 |
| 3-hydroxyhexanoate                                   | -0.93741855      | 0.029435937 | 0.169683493 |
| hydroxy-CMPF*                                        | -0.936166241     | 0.007016199 | 0.141441655 |
| dihomo-linolenoyl-choline                            | -0.932100444     | 0.041970859 | 0.173928856 |
| 6-bromotryptophan                                    | -0.930303198     | 0.02880637  | 0.169683493 |

|                                                       |              |             |             |
|-------------------------------------------------------|--------------|-------------|-------------|
| palmitate (16:0)                                      | -0.926001328 | 0.017079637 | 0.16249916  |
| eicosanedioate (C20-DC)                               | -0.910346154 | 0.025784235 | 0.16825866  |
| cysteinylglycine                                      | -0.8863994   | 0.00511391  | 0.141441655 |
| 1-arachidonoyl-GPC* (20:4)*                           | -0.881376606 | 0.038088284 | 0.169683493 |
| pentadecanoate (15:0)                                 | -0.87683545  | 0.012821685 | 0.141441655 |
| arachidate (20:0)                                     | -0.868556834 | 0.038066857 | 0.169683493 |
| cysteine sulfinic acid                                | -0.845540264 | 0.012811704 | 0.141441655 |
| pyridoxate                                            | -0.828002344 | 0.048814512 | 0.173975112 |
| 1-stearoyl-GPC (18:0)                                 | -0.81368143  | 0.011068407 | 0.141441655 |
| 1-stearoyl-2-linoleoyl-GPI (18:0/18:2)                | -0.796255449 | 0.007016199 | 0.141441655 |
| sphingomyelin (d18:2/21:0, d16:2/23:0)*               | -0.780291475 | 0.043077674 | 0.173928856 |
| sphingomyelin (d18:2/14:0, d18:1/14:1)*               | -0.777040495 | 0.038088284 | 0.169683493 |
| 1-(1-enyl-stearoyl)-GPE (P-18:0)*                     | -0.768343688 | 0.048814512 | 0.173975112 |
| linoleoylcarnitine (C18:2)*                           | -0.755565257 | 0.048814512 | 0.173975112 |
| 3-methylcrotonylglycine                               | -0.754451132 | 0.043170587 | 0.173928856 |
| cys-gly, oxidized                                     | -0.738430708 | 0.038088284 | 0.169683493 |
| 1-(1-enyl-stearoyl)-2-arachidonoyl-GPE (P-18:0/20:4)* | -0.724604079 | 0.029435937 | 0.169683493 |
| 1-linoleoyl-2-arachidonoyl-GPC (18:2/20:4n6)*         | -0.718814669 | 0.033524    | 0.169683493 |
| retinol (Vitamin A)                                   | -0.715690622 | 0.038088284 | 0.169683493 |
| tryptophan                                            | -0.695028261 | 0.012821685 | 0.141441655 |
| threonate                                             | -0.694885603 | 0.038088284 | 0.169683493 |
| citulline                                             | -0.642531904 | 0.005997428 | 0.141441655 |
| 1-stearoyl-2-docosahexaenoyl-GPC (18:0/22:6)          | -0.632366725 | 0.003690585 | 0.141441655 |
| methylsuccinate                                       | -0.61970496  | 0.00511391  | 0.141441655 |
| 5-methyluridine (ribothymidine)                       | -0.612962425 | 0.000751428 | 0.141441655 |
| gamma-tocopherol/beta-tocopherol                      | -0.606169779 | 0.048814512 | 0.173975112 |
| isocitrate                                            | -0.586800664 | 0.043077674 | 0.173928856 |
| aconitate [cis or trans]                              | -0.564952449 | 0.017079637 | 0.16249916  |
| 1-stearoyl-2-arachidonoyl-GPI (18:0/20:4)             | -0.544940948 | 0.005997428 | 0.141441655 |
| 3-hydroxyindolin-2-one sulfate                        | 0.546711948  | 0.032621784 | 0.169683493 |
| 1-carboxyethylphenylalanine                           | 0.645307439  | 0.043170587 | 0.173928856 |
| 5,6-dihydrothymine                                    | 0.710683085  | 0.033524    | 0.169683493 |
| 3-ureidoisobutyrate                                   | 0.791542981  | 0.043147355 | 0.173928856 |
| formiminoglutamate                                    | 0.821648995  | 0.033524    | 0.169683493 |
| indolin-2-one                                         | 0.950843086  | 0.04856357  | 0.173975112 |
| picolinate                                            | 1.00427424   | 0.011068407 | 0.141441655 |
| N-acetylputrescine                                    | 1.004901066  | 0.017079637 | 0.16249916  |
| 3-ureidopropionate                                    | 1.058330318  | 0.011068407 | 0.141441655 |
| N-acetyl-1-methylhistidine*                           | 1.072934337  | 0.005997428 | 0.141441655 |
| glycerol 3-phosphate                                  | 1.100730961  | 0.022531072 | 0.16825866  |
| kynurenine                                            | 1.151278114  | 0.001563119 | 0.141441655 |
| anthranilate                                          | 1.271902544  | 0.008046101 | 0.141441655 |
| quinolinate                                           | 1.488138954  | 0.005997428 | 0.141441655 |
| N-formylanthranilic acid                              | 1.492824658  | 0.043170587 | 0.173928856 |
| urate                                                 | 1.664740426  | 0.008187777 | 0.141441655 |
| 3-methoxytyramine sulfate                             | 3.508192085  | 0.026507093 | 0.169683493 |
| glycochenodeoxycholate glucuronide (1)                | 4.783895949  | 0.045500264 | 0.173975112 |
| 2,3-dihydroxyisovalerate                              | 4.865244142  | 0.030514659 | 0.169683493 |
| carnosine                                             | 5.24654175   | 0.043170587 | 0.173928856 |

**Supplementary Table 1.** Significantly increased metabolites following SIV infection.



| BIOCHEMICAL                                    | log2fc SIV+MSC+/SIV+ | p.value     | q.value     |
|------------------------------------------------|----------------------|-------------|-------------|
| carnosine                                      | -7.481601691         | 0.028459737 | 0.074378169 |
| 3-methoxytyramine sulfate                      | -5.996513323         | 0.017365464 | 0.061799624 |
| 2,3-dihydroxyisovalerate                       | -5.490208715         | 0.049745991 | 0.103611059 |
| 4-acetamidobenzoate                            | -4.656082984         | 0.049745991 | 0.103611059 |
| heme                                           | -2.929626822         | 0.017622091 | 0.061799624 |
| 2-pyrrolidinone                                | -2.796731623         | 0.016604954 | 0.061799624 |
| suberoylcarnitine (C8-DC)                      | -2.740783881         | 0.042680184 | 0.094350021 |
| picolinate                                     | -2.426197789         | 0.006169899 | 0.061183519 |
| leucylhydroxyproline*                          | -2.012967128         | 0.034463821 | 0.089499495 |
| 2-hydroxyheptanoate*                           | -1.941549461         | 0.017622091 | 0.061799624 |
| 1-carboxyethylisoleucine                       | -1.767752299         | 0.006169899 | 0.061183519 |
| indoleacetyl carnitine*                        | -1.762487816         | 0.028459737 | 0.074378169 |
| 1-carboxyethylvaline                           | -1.753070354         | 0.006169899 | 0.061183519 |
| N-acetyl-1-methylhistidine*                    | -1.751185545         | 0.017622091 | 0.061799624 |
| octadecenedioylcarnitine (C18:1-DC)*           | -1.740100966         | 0.028459737 | 0.074378169 |
| tiglyl carnitine (C5)                          | -1.709954315         | 0.006169899 | 0.061183519 |
| 2S,3R-dihydroxybutyrate                        | -1.66735092          | 0.017622091 | 0.061799624 |
| 2-aminobutyrate                                | -1.660025582         | 0.006169899 | 0.061183519 |
| N,N,N-trimethyl-alanylproline betaine (TMAP)   | -1.631452879         | 0.006169899 | 0.061183519 |
| alpha-hydroxyisovalerate                       | -1.626522448         | 0.006169899 | 0.061183519 |
| propionylcarnitine (C3)                        | -1.617858436         | 0.010587137 | 0.061183519 |
| N-acetyl-aspartyl-glutamate (NAAG)             | -1.538713286         | 0.017622091 | 0.061799624 |
| lanthionine                                    | -1.520176575         | 0.042680184 | 0.094350021 |
| alpha-hydroxyisocaproate                       | -1.495161632         | 0.006053705 | 0.061183519 |
| 2-hydroxy-3-methylvalerate                     | -1.444446422         | 0.006053705 | 0.061183519 |
| N-acetylneuraminic acid                        | -1.430568227         | 0.027030077 | 0.074378169 |
| gamma-glutamyl-2-aminobutyrate                 | -1.405759686         | 0.028459737 | 0.074378169 |
| gamma-glutamylmethionine                       | -1.369458037         | 0.044609718 | 0.094350021 |
| bilirubin                                      | -1.265786576         | 0.006169899 | 0.061183519 |
| alpha-ketobutyrate                             | -1.25817073          | 0.010411098 | 0.061183519 |
| octadecanedioylcarnitine (C18-DC)*             | -1.251747669         | 0.044609718 | 0.094350021 |
| beta-hydroxyisovaleroylcarnitine               | -1.239832209         | 0.028459737 | 0.074378169 |
| biliverdin                                     | -1.226789656         | 0.017622091 | 0.061799624 |
| beta-alanine                                   | -1.218418548         | 0.028459737 | 0.074378169 |
| 2-hydroxybutyrate/2-hydroxyisobutyrate         | -1.213676571         | 0.028459737 | 0.074378169 |
| arabitol/xylitol                               | -1.212374267         | 0.028459737 | 0.074378169 |
| malonylcarnitine                               | -1.191391133         | 0.010587137 | 0.061183519 |
| butyrylcarnitine (C4)                          | -1.169700297         | 0.028459737 | 0.074378169 |
| 2-methylbutyrylcarnitine (C5)                  | -1.159026908         | 0.010587137 | 0.061183519 |
| N-acetylputrescine                             | -1.152255257         | 0.044609718 | 0.094350021 |
| threonine                                      | -1.061843235         | 0.006169899 | 0.061183519 |
| isobutyrylcarnitine (C4)                       | -1.03549576          | 0.006169899 | 0.061183519 |
| creatine                                       | -1.026617677         | 0.006169899 | 0.061183519 |
| deoxycarnitine                                 | -1.015168155         | 0.017622091 | 0.061799624 |
| alanine                                        | -0.96189517          | 0.006169899 | 0.061183519 |
| gamma-glutamylthreonine                        | -0.951338239         | 0.028459737 | 0.074378169 |
| fructosyllysine                                | -0.947538844         | 0.028459737 | 0.074378169 |
| hydroxyproline                                 | -0.888460936         | 0.010587137 | 0.061183519 |
| 1-carboxyethylleucine                          | -0.881190596         | 0.044609718 | 0.094350021 |
| hydroxy-N6,N6,N6-trimethyllysine*              | -0.873878131         | 0.028459737 | 0.074378169 |
| nonanoylcarnitine (C9)                         | -0.86470595          | 0.017622091 | 0.061799624 |
| asparagine                                     | -0.847075066         | 0.006169899 | 0.061183519 |
| N6-carbamoylthreonyladenosine                  | -0.807296888         | 0.042680184 | 0.094350021 |
| methionine                                     | -0.774444641         | 0.006169899 | 0.061183519 |
| N-acetylglucosamine/N-acetylgalactosamine      | -0.764669543         | 0.006169899 | 0.061183519 |
| gamma-glutamylvaline                           | -0.753371499         | 0.044609718 | 0.094350021 |
| carnitine                                      | -0.74704285          | 0.017622091 | 0.061799624 |
| 1,2-dipalmitoyl-GPC (16:0/16:0)                | -0.669233733         | 0.028459737 | 0.074378169 |
| gamma-glutamylhistidine                        | -0.660160058         | 0.028459737 | 0.074378169 |
| 3-hydroxyisobutyrate                           | -0.654025137         | 0.044609718 | 0.094350021 |
| N-acetyl-isoptureanine                         | -0.647633587         | 0.017622091 | 0.061799624 |
| valine                                         | -0.646120684         | 0.044609718 | 0.094350021 |
| gamma-glutamylphenylalanine                    | -0.634938628         | 0.017622091 | 0.061799624 |
| gamma-glutamyltyrosine                         | -0.618567752         | 0.044609718 | 0.094350021 |
| histidine                                      | -0.584800649         | 0.017622091 | 0.061799624 |
| ribitol                                        | -0.570876034         | 0.017622091 | 0.061799624 |
| 1-palmitoyl-2-docosahexaenoyl-GPE (16:0/22:6)* | 0.54620997           | 0.044609718 | 0.094350021 |
| behenoyl sphingomyelin (d18:1/22:0)*           | 0.576476202          | 0.044609718 | 0.094350021 |
| 1-stearoyl-2-oleoyl-GPC (18:0/18:1)            | 0.593015043          | 0.044609718 | 0.094350021 |
| 1-stearoyl-2-linoleoyl-GPE (18:0/18:2)*        | 0.647039666          | 0.028459737 | 0.074378169 |

|                                                    |             |             |             |
|----------------------------------------------------|-------------|-------------|-------------|
| carotene diol (2)                                  | 0.657431522 | 0.044609718 | 0.094350021 |
| methylsuccinate                                    | 0.660088925 | 0.017622091 | 0.061799624 |
| 4-hydroxyphenylpyruvate                            | 0.668623387 | 0.044609718 | 0.094350021 |
| lignoceroyl sphingomyelin (d18:1/24:0)             | 0.677633096 | 0.044609718 | 0.094350021 |
| 1-stearoyl-2-arachidonoyl-GPI (18:0/20:4)          | 0.68512921  | 0.006169899 | 0.061183519 |
| 1-arachidonoyl-GPE (20:4n6)*                       | 0.690625367 | 0.044609718 | 0.094350021 |
| glutamate                                          | 0.708462343 | 0.044609718 | 0.094350021 |
| sphingomyelin (d18:1/14:0, d16:1/16:0)*            | 0.741322178 | 0.010587137 | 0.061183519 |
| sphingomyelin (d18:2/14:0, d18:1/14:1)*            | 0.745475529 | 0.044609718 | 0.094350021 |
| 3,5-dichloro-2,6-dihydroxybenzoic acid             | 0.757449301 | 0.028459737 | 0.074378169 |
| hydroxy-CMPF*                                      | 0.793120578 | 0.017622091 | 0.061799624 |
| 1-oleoyl-2-linoleoyl-GPE (18:1/18:2)*              | 0.842045939 | 0.028459737 | 0.074378169 |
| glycerophosphorylcholine (GPC)                     | 0.914730319 | 0.044609718 | 0.094350021 |
| threonate                                          | 0.916751037 | 0.044609718 | 0.094350021 |
| thyroxine                                          | 0.934942882 | 0.044609718 | 0.094350021 |
| 1-(1-enyl-stearoyl)-2-oleoyl-GPE (P-18:0/18:1)     | 0.95457994  | 0.017622091 | 0.061799624 |
| 1-oleoyl-2-docosahexaenoyl-GPC (18:1/22:6)*        | 0.987259558 | 0.010587137 | 0.061183519 |
| 1-(1-enyl-stearoyl)-2-linoleoyl-GPE (P-18:0/18:2)* | 0.987837003 | 0.017622091 | 0.061799624 |
| 1-palmitoyl-GPC (16:0)                             | 0.992351032 | 0.028459737 | 0.074378169 |
| 1-(1-enyl-palmitoyl)-GPE (P-16:0)*                 | 1.010818047 | 0.017622091 | 0.061799624 |
| 3-methylcrotonylglycine                            | 1.012915561 | 0.017622091 | 0.061799624 |
| butyrylglycine (C4)                                | 1.059320736 | 0.017622091 | 0.061799624 |
| 1-arachidonoyl-GPC* (20:4)*                        | 1.062663696 | 0.010587137 | 0.061183519 |
| homoarginine                                       | 1.118585989 | 0.006169899 | 0.061183519 |
| 1-stearoyl-GPE (18:0)                              | 1.134704936 | 0.028459737 | 0.074378169 |
| 3-bromo-5-chloro-2,6-dihydroxybenzoic acid*        | 1.160359117 | 0.010587137 | 0.061183519 |
| cysteine sulfinic acid                             | 1.169877918 | 0.028100064 | 0.074378169 |
| 1-linoleoyl-2-arachidonoyl-GPC (18:2/20:4n6)*      | 1.199266181 | 0.006169899 | 0.061183519 |
| 1-linoleoyl-GPC (18:2)                             | 1.228041289 | 0.028459737 | 0.074378169 |
| 2-hydroxypalmitate                                 | 1.258430985 | 0.044609718 | 0.094350021 |
| 1-(1-enyl-palmitoyl)-GPC (P-16:0)*                 | 1.272501259 | 0.028459737 | 0.074378169 |
| 1-oleoyl-GPC (18:1)                                | 1.286746681 | 0.028459737 | 0.074378169 |
| 1-myristoyl-2-arachidonoyl-GPC (14:0/20:4)*        | 1.295683523 | 0.028459737 | 0.074378169 |
| 1-palmitoleoyl-2-linolenoyl-GPC (16:1/18:3)*       | 1.335383433 | 0.017622091 | 0.061799624 |
| 2-hydroxystearate                                  | 1.341706284 | 0.010411098 | 0.061183519 |
| 1-stearoyl-2-linoleoyl-GPI (18:0/18:2)             | 1.357494429 | 0.006169899 | 0.061183519 |
| 1,2-dilinoleoyl-GPC (18:2/18:2)                    | 1.39196874  | 0.006169899 | 0.061183519 |
| phenylacetylglutamine                              | 1.401389153 | 0.044609718 | 0.094350021 |
| 10-undecenoate (11:1n1)                            | 1.405502892 | 0.017622091 | 0.061799624 |
| 1-palmitoyl-2-arachidonoyl-GPI (16:0/20:4)*        | 1.414674318 | 0.010587137 | 0.061183519 |
| retinol (Vitamin A)                                | 1.416256615 | 0.010587137 | 0.061183519 |
| 3-hydroxyhippurate                                 | 1.427874504 | 0.022043575 | 0.074378169 |
| 1-oleoyl-2-docosahexaenoyl-GPE (18:1/22:6)*        | 1.432828545 | 0.017622091 | 0.061799624 |
| phenylacetylglutamine                              | 1.44168396  | 0.028459737 | 0.074378169 |
| 3beta-hydroxy-5-cholestenate                       | 1.442677825 | 0.04412557  | 0.094350021 |
| leucylalanine                                      | 1.454436088 | 0.017365464 | 0.061799624 |
| 1-stearoyl-GPC (18:0)                              | 1.464477836 | 0.006169899 | 0.061183519 |
| oleoyl-linoleoyl-glycerol (18:1/18:2) [2]          | 1.493128794 | 0.006169899 | 0.061183519 |
| 6-bromotryptophan                                  | 1.494618883 | 0.028100064 | 0.074378169 |
| palmitoyl-linoleoyl-glycerol (16:0/18:2) [2]*      | 1.499613849 | 0.010587137 | 0.061183519 |
| 1-(1-enyl-stearoyl)-GPE (P-18:0)*                  | 1.503862029 | 0.017622091 | 0.061799624 |
| 1-palmitoyl-2-linoleoyl-GPI (16:0/18:2)            | 1.510887005 | 0.006169899 | 0.061183519 |
| 1-palmitoyl-2-oleoyl-GPI (16:0/18:1)*              | 1.531050876 | 0.010587137 | 0.061183519 |
| arachidonate (20:4n6)                              | 1.539182232 | 0.017622091 | 0.061799624 |
| 1-oleoyl-2-arachidonoyl-GPI (18:1/20:4)*           | 1.540342259 | 0.010587137 | 0.061183519 |
| docosapentaenoate (n6 DPA; 22:5n6)                 | 1.564910216 | 0.010411098 | 0.061183519 |
| picolinoylglycine                                  | 1.570293955 | 0.024932456 | 0.074378169 |
| p-cresol glucuronide*                              | 1.591896431 | 0.028100064 | 0.074378169 |
| oleoyl-linoleoyl-glycerol (18:1/18:2) [1]          | 1.59232199  | 0.006169899 | 0.061183519 |
| p-cresol sulfate                                   | 1.596099303 | 0.010587137 | 0.061183519 |
| dihomolinate (20:3n3 or 3n6)                       | 1.640998438 | 0.017622091 | 0.061799624 |
| 3-hydroxystearate                                  | 1.641611476 | 0.006053705 | 0.061183519 |
| 3-indoxyl sulfate                                  | 1.663004514 | 0.010587137 | 0.061183519 |
| palmitoyl-linoleoyl-glycerol (16:0/18:2) [1]*      | 1.67363603  | 0.010587137 | 0.061183519 |
| 6-hydroxyindole sulfate                            | 1.674419988 | 0.017622091 | 0.061799624 |
| 4-oxo-retinoic acid                                | 1.677501427 | 0.035174861 | 0.090204178 |
| 2-stearoyl-GPE (18:0)*                             | 1.730596619 | 0.017365464 | 0.061799624 |
| 2-palmitoyl-GPC* (16:0)*                           | 1.763434508 | 0.010587137 | 0.061183519 |
| retinal                                            | 1.782327675 | 0.010411098 | 0.061183519 |
| linoleoyl-linoleoyl-glycerol (18:2/18:2) [1]*      | 1.789837853 | 0.006169899 | 0.061183519 |
| 1-linoleoyl-GPA (18:2)*                            | 1.793632323 | 0.006169899 | 0.061183519 |
| palmitoyl-oleoyl-glycerol (16:0/18:1) [2]*         | 1.853941265 | 0.017622091 | 0.061799624 |
| 1-ribosyl-imidazoleacetate*                        | 1.883247668 | 0.028459737 | 0.074378169 |
| N-methylproline                                    | 1.930450673 | 0.017622091 | 0.061799624 |
| linoleoyl-linolenoyl-glycerol (18:2/18:3) [1]*     | 1.941226564 | 0.028459737 | 0.074378169 |
| 1-linoleoyl-2-linolenoyl-GPC (18:2/18:3)*          | 1.955987792 | 0.006169899 | 0.061183519 |

|                                                     |             |             |             |
|-----------------------------------------------------|-------------|-------------|-------------|
| 1-stearoyl-2-oleoyl-GPI (18:0/18:1)*                | 1.974733913 | 0.010587137 | 0.061183519 |
| docosahexaenoate (DHA; 22:6n3)                      | 2.005016062 | 0.010587137 | 0.061183519 |
| 1-linoleoyl-GPI* (18:2)*                            | 2.027711681 | 0.010587137 | 0.061183519 |
| 1-linolenoyl-GPC (18:3)*                            | 2.032388012 | 0.010587137 | 0.061183519 |
| palmitoyl-oleoyl-glycerol (16:0/18:1) [1]*          | 2.033937001 | 0.010587137 | 0.061183519 |
| oleoyl-oleoyl-glycerol (18:1/18:1) [1]*             | 2.047781907 | 0.006169899 | 0.061183519 |
| 1-palmitoleoyl-GPC* (16:1)*                         | 2.069231452 | 0.010587137 | 0.061183519 |
| 1-stearoyl-GPI (18:0)                               | 2.246094543 | 0.006169899 | 0.061183519 |
| oleoyl-oleoyl-glycerol (18:1/18:1) [2]*             | 2.275772766 | 0.006169899 | 0.061183519 |
| palmitoylcholine                                    | 2.323572496 | 0.044609718 | 0.094350021 |
| 1-lignoceroyl-GPC (24:0)                            | 2.332098181 | 0.028100064 | 0.074378169 |
| 4-allylphenol sulfate                               | 2.339887309 | 0.027030077 | 0.074378169 |
| palmitoleoyl-linoleoyl-glycerol (16:1/18:2) [1]*    | 2.443806894 | 0.010587137 | 0.061183519 |
| 3-phenylpropionate (hydrocinnamate)                 | 2.464139538 | 0.04412557  | 0.094350021 |
| diacylglycerol (16:1/18:2 [2], 16:0/18:3 [1])*      | 2.498572284 | 0.010587137 | 0.061183519 |
| linoleoyl-linolenoyl-glycerol (18:2/18:3) [2]*      | 2.578432302 | 0.00734473  | 0.061183519 |
| heneicosapentaenoate (21:5n3)                       | 2.624217659 | 0.028100064 | 0.074378169 |
| 1-oleoyl-GPI (18:1)                                 | 2.812955637 | 0.017365464 | 0.061799624 |
| hippurate                                           | 2.91708645  | 0.028459737 | 0.074378169 |
| palmitoleoyl-arachidonoyl-glycerol (16:1/20:4) [2]* | 3.004934795 | 0.035174861 | 0.090204178 |
| 1-palmitoyl-GPI* (16:0)                             | 3.03685194  | 0.010411098 | 0.061183519 |
| cinnamoylglycine                                    | 3.237277871 | 0.017365464 | 0.061799624 |
| docosahexaenoylcholine                              | 3.274370086 | 0.017365464 | 0.061799624 |
| equol glucuronide                                   | 3.484777815 | 0.011163994 | 0.061799624 |
| N-acetyltryptophan                                  | 3.61102606  | 0.015127246 | 0.061799624 |
| deoxycholate                                        | 3.679342924 | 0.017622091 | 0.061799624 |
| 4-methylcatechol sulfate                            | 3.767300958 | 0.04412557  | 0.094350021 |
| lithocholate                                        | 4.032029996 | 0.011163994 | 0.061799624 |
| dihomo-linolenoyl-choline                           | 4.160179239 | 0.036571191 | 0.093202483 |
| indolepropionate                                    | 4.597916618 | 0.017622091 | 0.061799624 |
| 4-ethylphenyl sulfate                               | 5.578175588 | 0.010411098 | 0.061183519 |
| equol sulfate                                       | 5.876817264 | 0.016604954 | 0.061799624 |

**Supplementary Table 2.** Significantly increased metabolites following MSC administration.

| <b>Study Group</b> | <b>Animals/group</b> | <b>Weight (kg)</b> | <b>Sex (F:M)</b> | <b>Age (yrs.)</b> |
|--------------------|----------------------|--------------------|------------------|-------------------|
| SIV-               | 18                   | 9.6 ± 2.3          | 2:16             | 6.0 ± 1.9         |
| SIV+               | 12                   | 9.7 ± 2.8          | 3:9              | 8.0 ± 1.1         |
| SIV+MSC+           | 5                    | 7.2 ± 1.3          | 5:0              | 6.8 ± 1.9         |

**Supplementary Table 3.** Characteristics of animals in the study groups

| Antigen/Reagent  | Conjugate     | Clone     | Company           | Catalog Number |
|------------------|---------------|-----------|-------------------|----------------|
| CD3              | Pacific Blue  | SP34-2    | BD                | 558124         |
| CD3              | AF700         | SP-234    | BD                | 557917         |
| CD4              | PerPCy5.5     | OKT4      | Biolegend         | 317427         |
| CD4              | BV650         | L200      | BD                | 563737         |
| CD8              | PE Dazzle 594 | RPA-T8    | Biolegend         | 301057         |
| CD8              | PerCPCy5.5    | SK1       | BD                | 341049         |
| CD8              | BV510         | SK1       | BD                | 563919         |
| CD45             | AF700         | D058-1283 | BD                | 561288         |
| Ki67             | AF488         | B56       | Fisher Scientific | BDB561165      |
| CD95             | APC           | DX2       | BD                | 558814         |
| CD95             | BUV737        | DX2       | BD                | 564710         |
| CXCR5            | PE            | MU5UBEE   | Invitrogen        | 12-9185-411G1  |
| CXCR5            | BV421         | MU5BEE    | Invitrogen        | 48-9185-4      |
| PD-1             | PECyanine7    | EH12.2H7  | Biolegend         | 329918         |
| Granzyme B       | PECF594       | GB11      | BD                | 562462         |
| CD20             | BV421         | 2H7       | Biolegend         | 302328         |
| CD20             | APC-H7        | L27       | BD                | 641396         |
| CD11c            | BV650         | S-HCL-3   | BD                | 744437         |
| CD21             | PECyanine7    | B-ly4     | BD                | 561374         |
| CD27             | Pacific Blue  | M-T271    | Biolegend         | 356413         |
| CD80             | PE            | L307-4    | BD                | 557227         |
| IgD              | FITC          |           | Southern Biotech  | 2030-02        |
| IFN $\gamma$     | PECyanine7    | B27       | BD                | 557643         |
| TNF- $\alpha$    | AF488         | Mab11     | Invitrogen        | 53-734971      |
| Live-dead marker | APCCy7        | NA        | Invitrogen        | L34976A        |
| Live-dead marker | Aqua          | NA        | Invitrogen        | L34957         |

**Supplementary Table 4.** Flow cytometry reagents.
